# Supplementary material
Source: Springer Nature journal article supplement (https://www.springermedizin.de/resource/supplementary/13256_2009_1040_MOESM1_ESM.pdf/9647684)

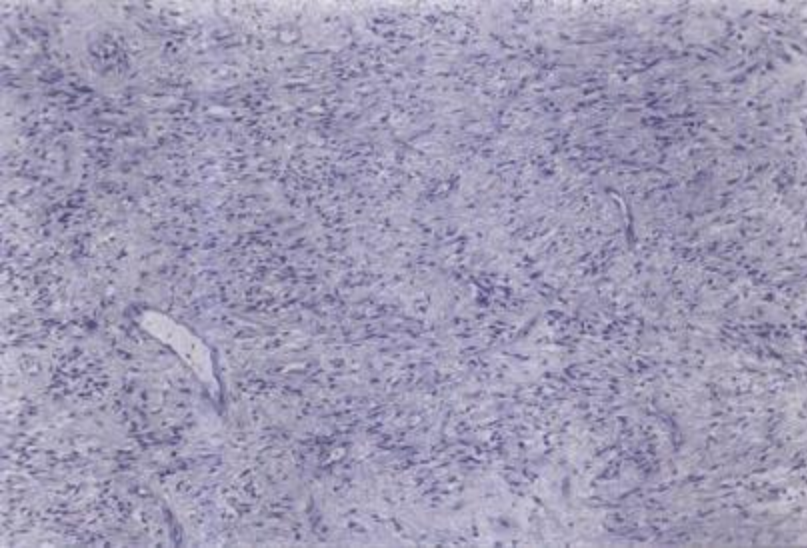

Supplement: MOESM1 [file 9647684]
